# Supplementary material
Source: MDPI journal article supplement (https://www.mdpi.com/2571-6131/6/4/131)
Supplement: s1 [file s1 › ceramics-2629261-supplementary.pdf]

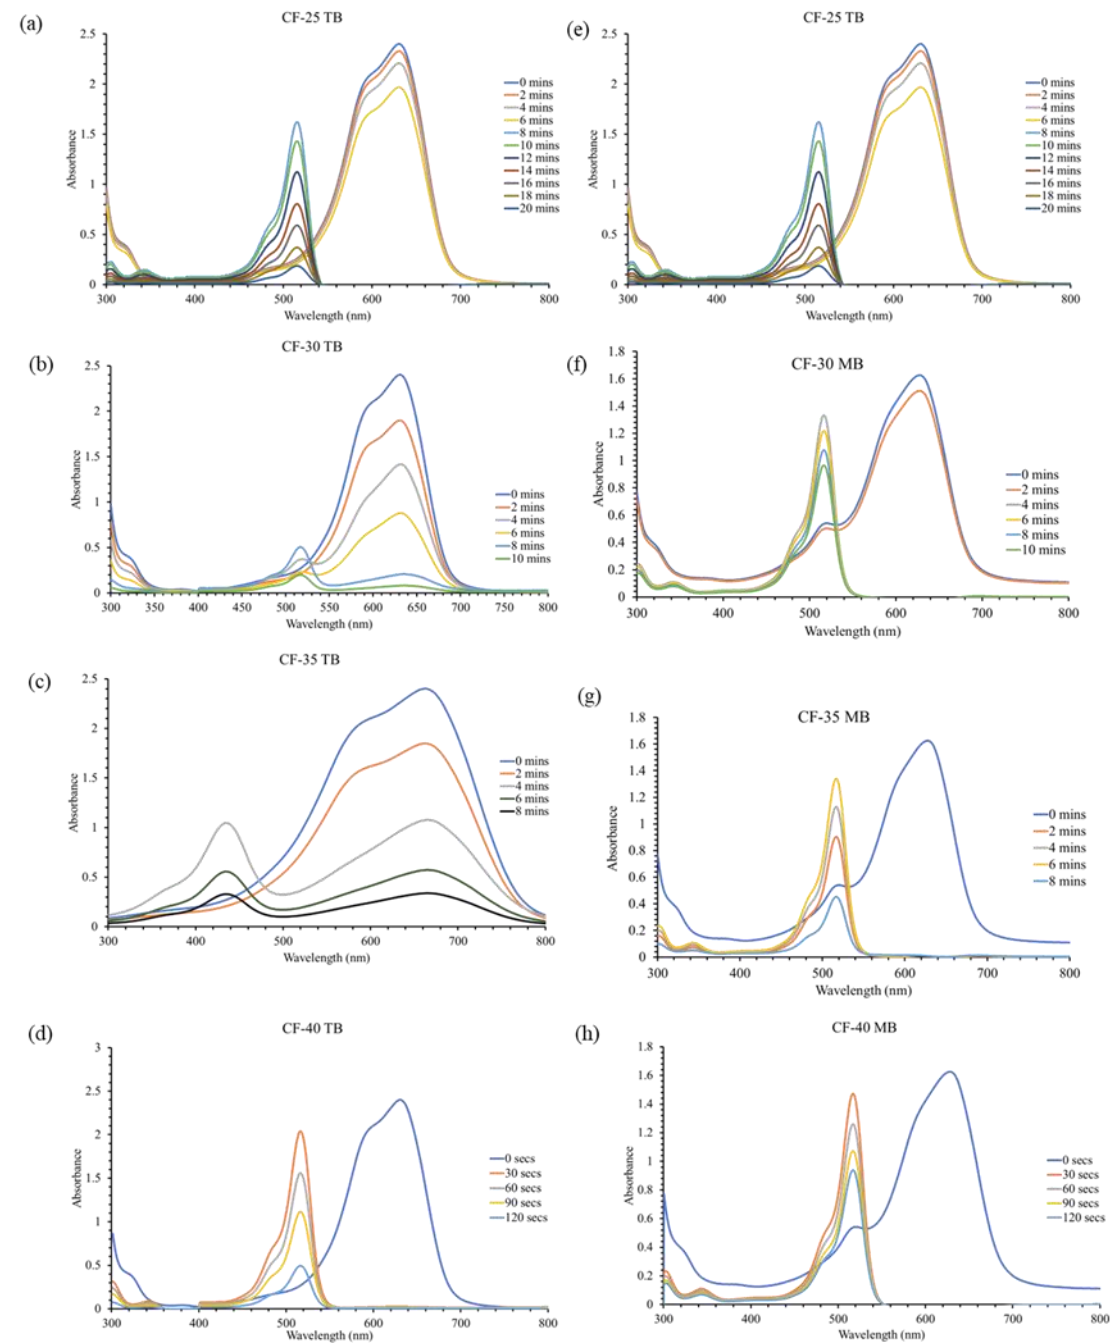

**Figure S1:** UV-vis spectra for residual *o*-Toluidine blue (a-d), methylene blue (e-h) after passing through CFs

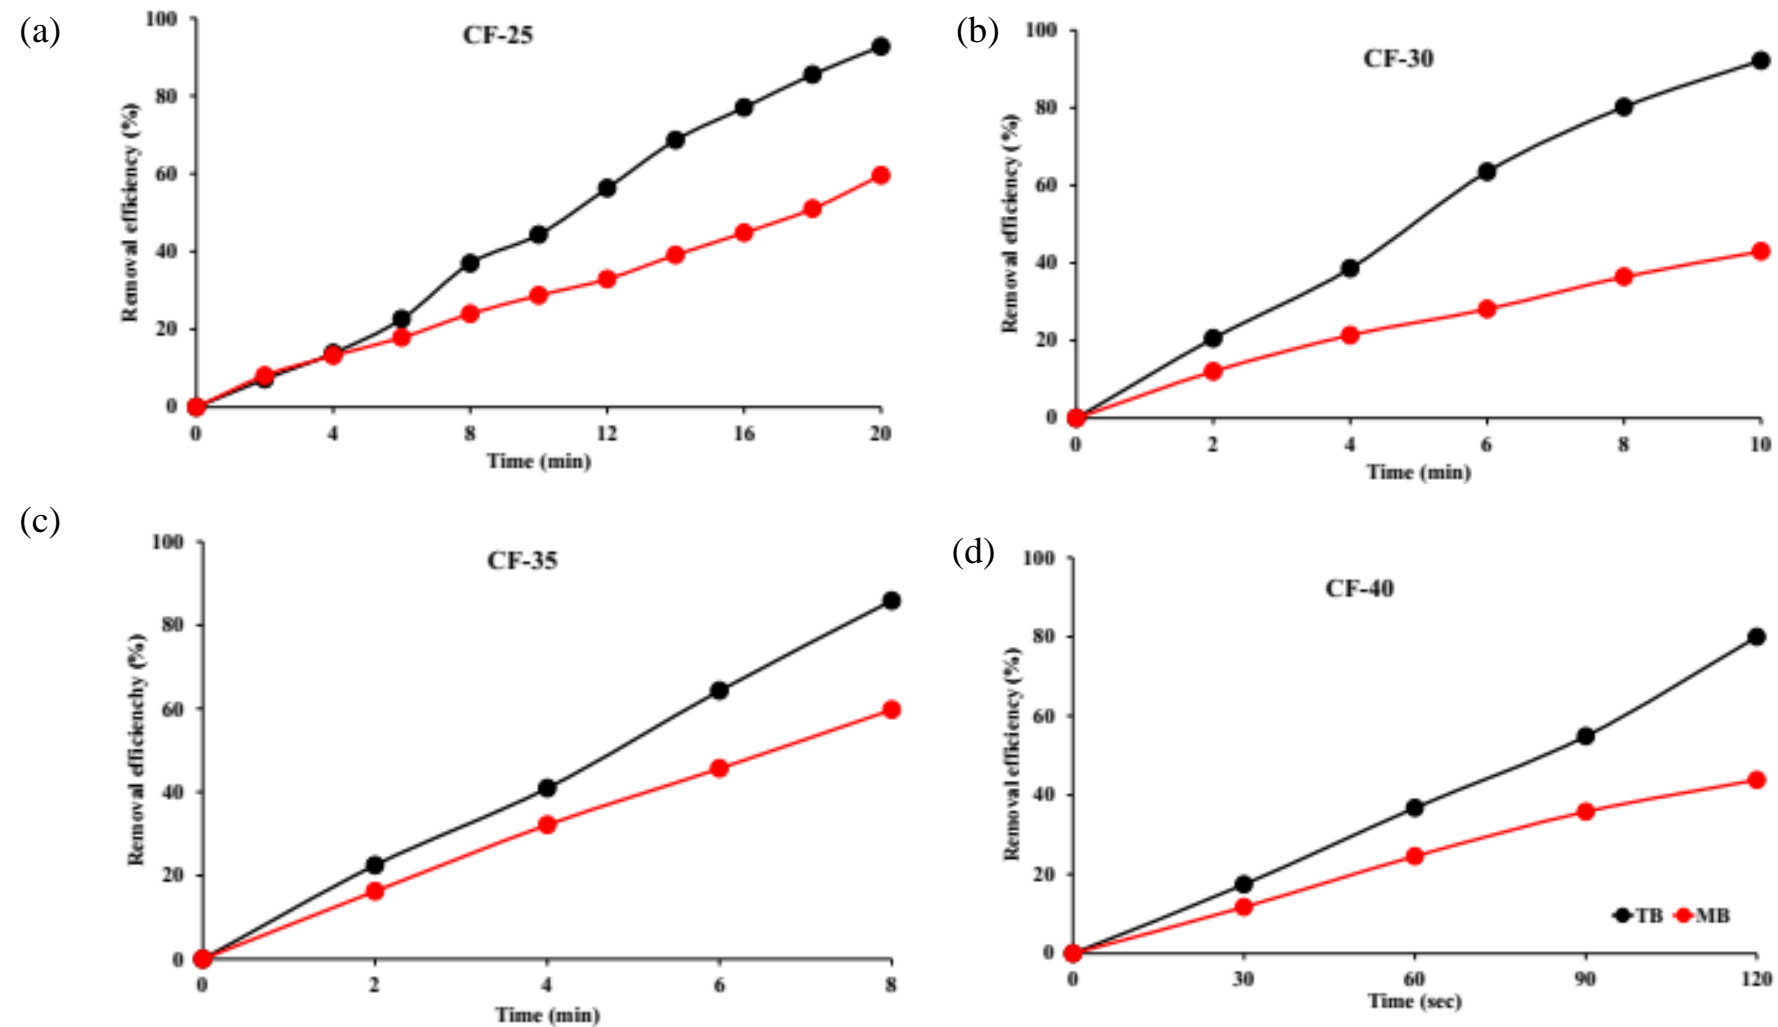

**Figure S2:** The removal efficiencies for MB and *o*-TB using ceramic filters
